# Supplementary material for: Synthesis, Molecular Docking Study, and Cytotoxicity Evaluation of Some Novel 1,3,4-Thiadiazole as Well as 1,3-Thiazole Derivatives Bearing a Pyridine Moiety
Source: Molecules. 2022 Sep 27;27(19):6368. doi: 10.3390/molecules27196368 (PMC9572991; doi:10.3390/molecules27196368)
Supplement: Supplementary file 1 [file molecules-27-06368-s001.zip › molecules-1920307-supplementary.pdf]

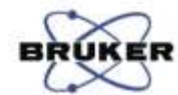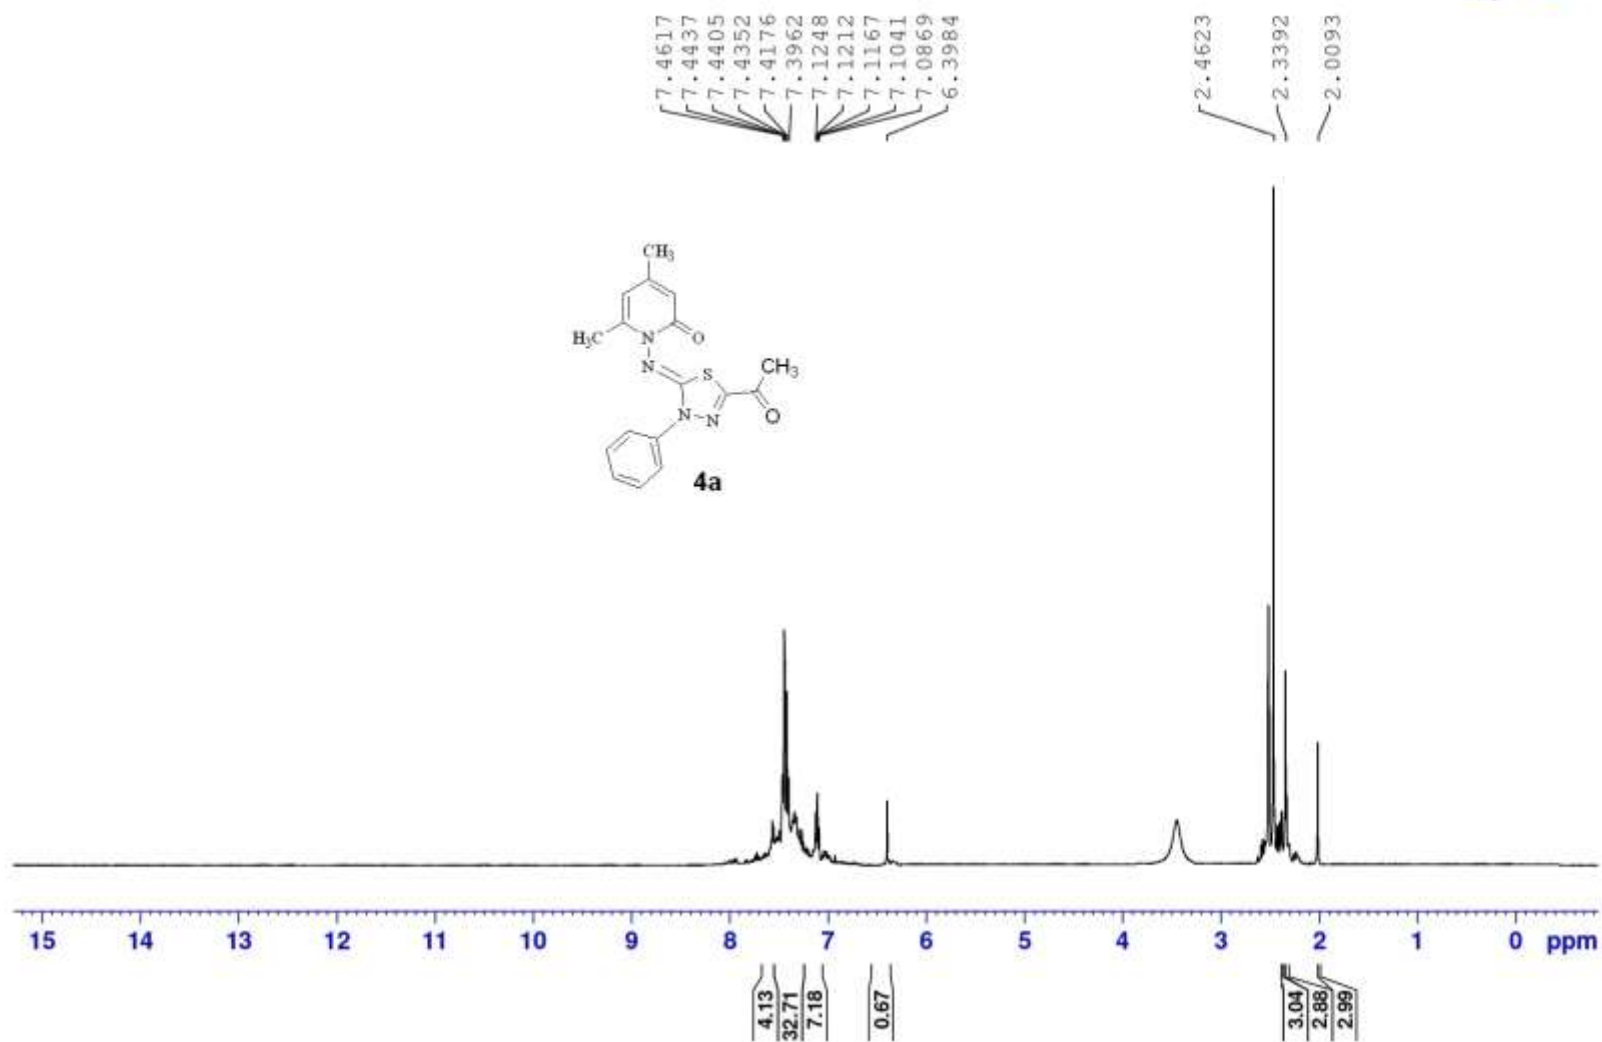

<sup>1</sup>H-NMR of compound **4a**

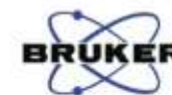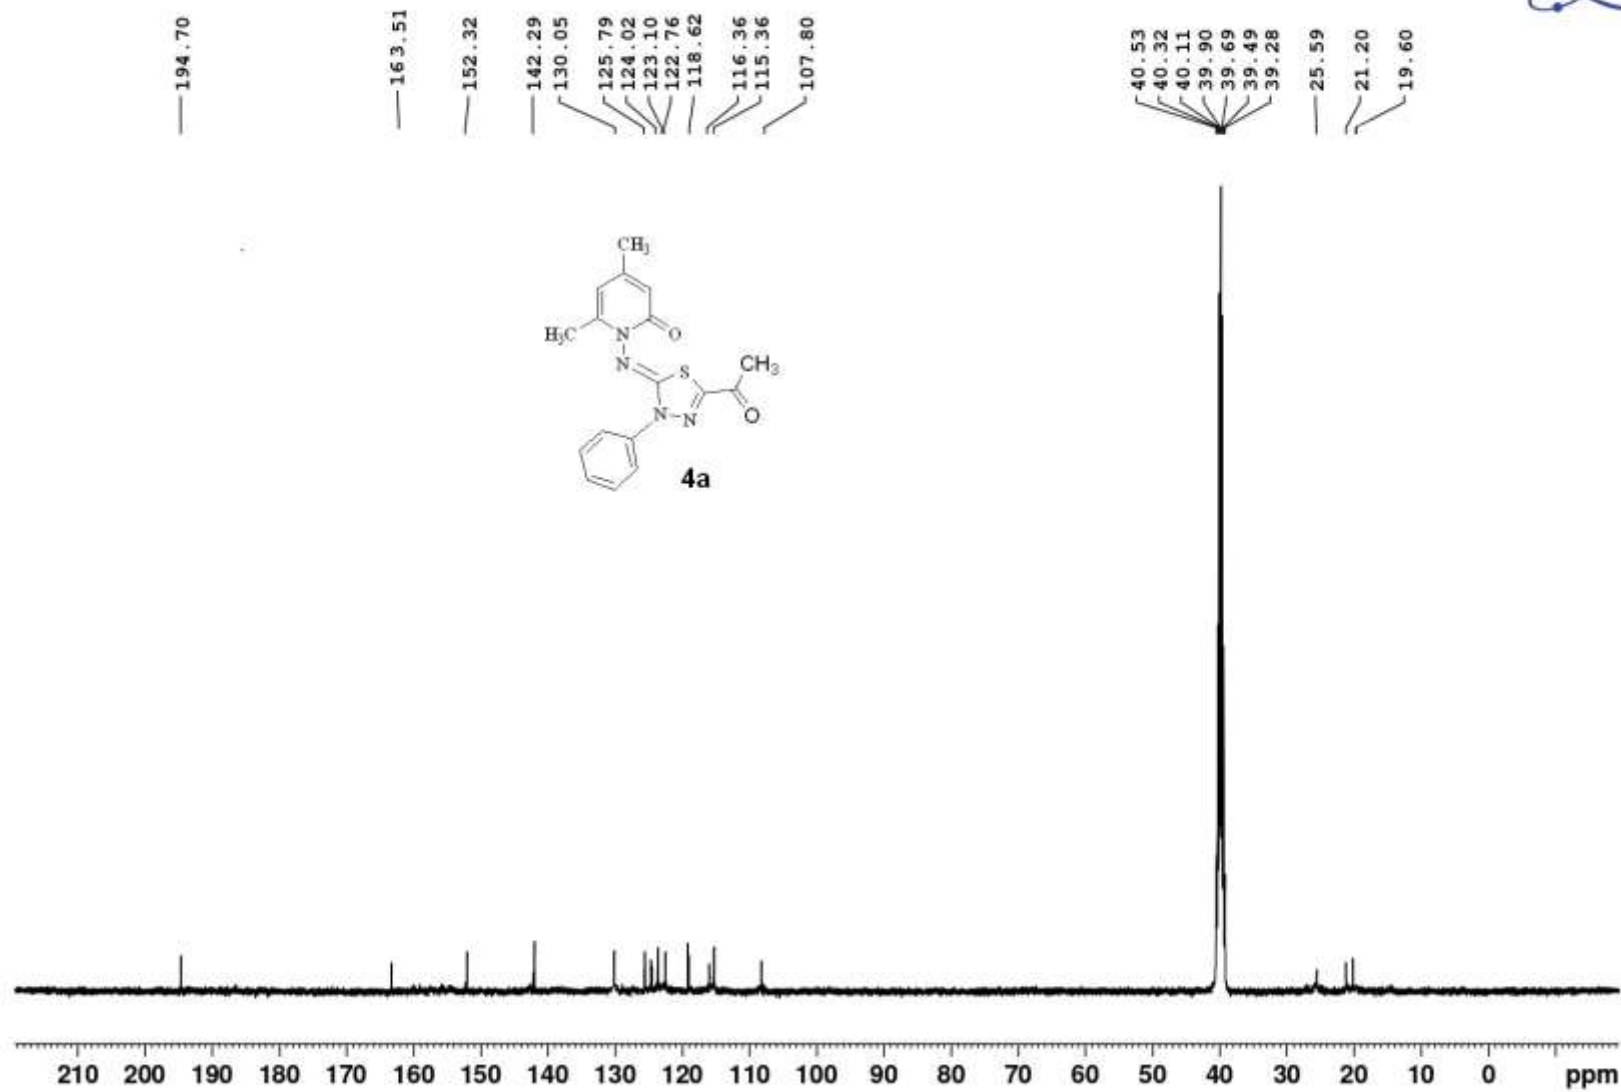

<sup>13</sup>C-NMR of compound **4a**

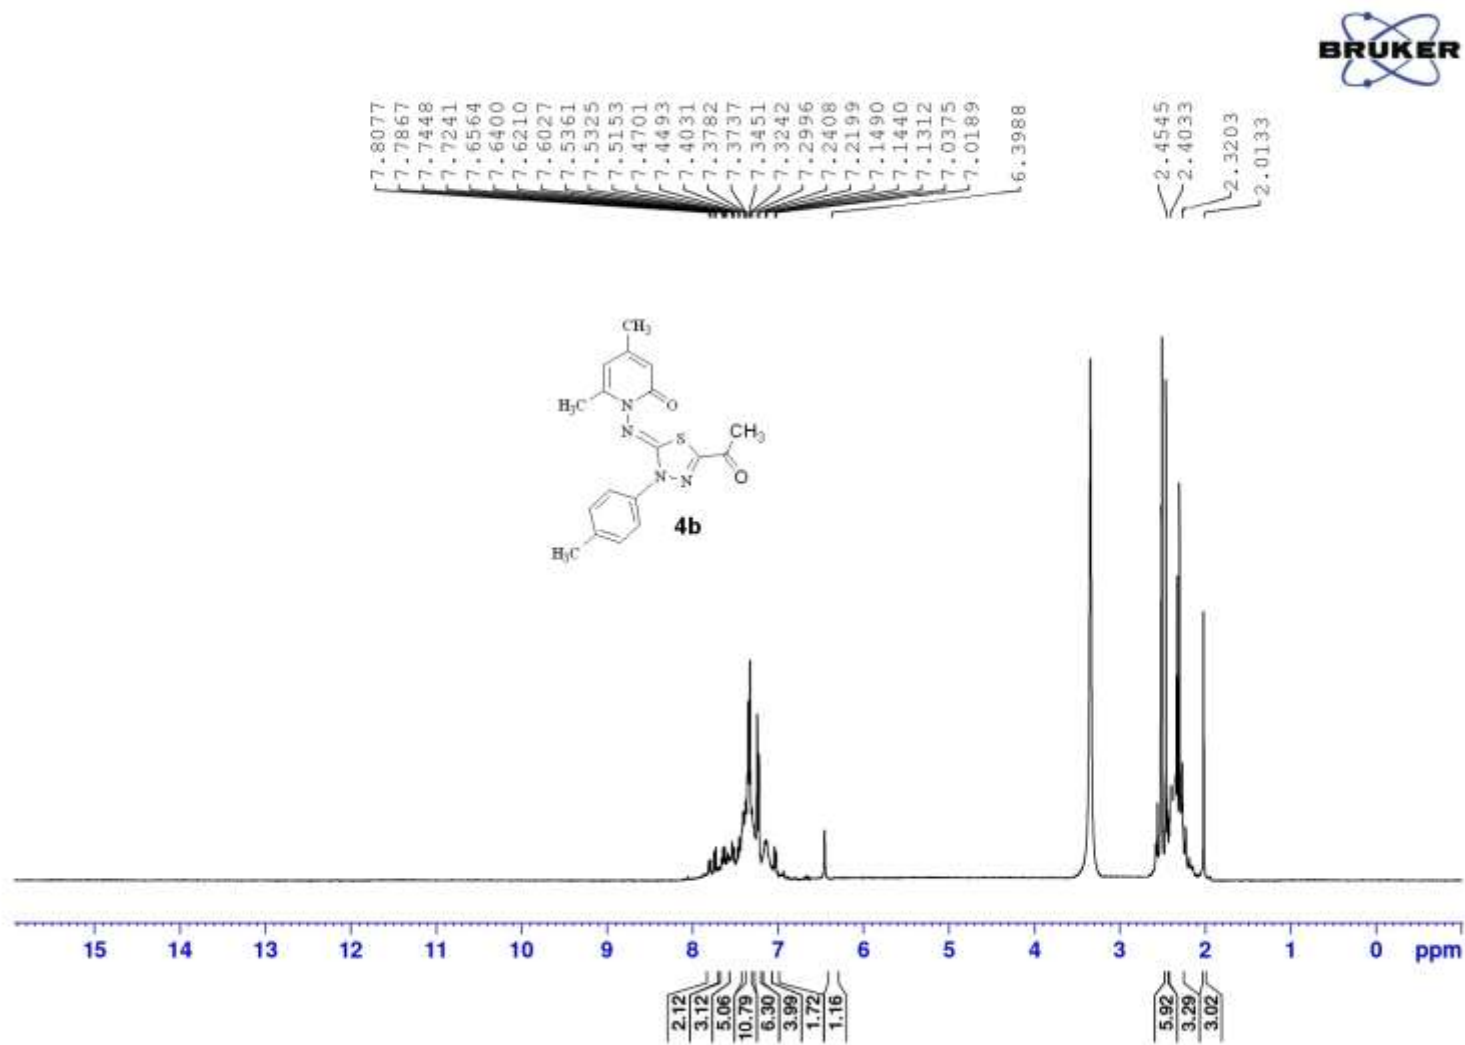

<sup>1</sup>H-NMR of compound **4b**

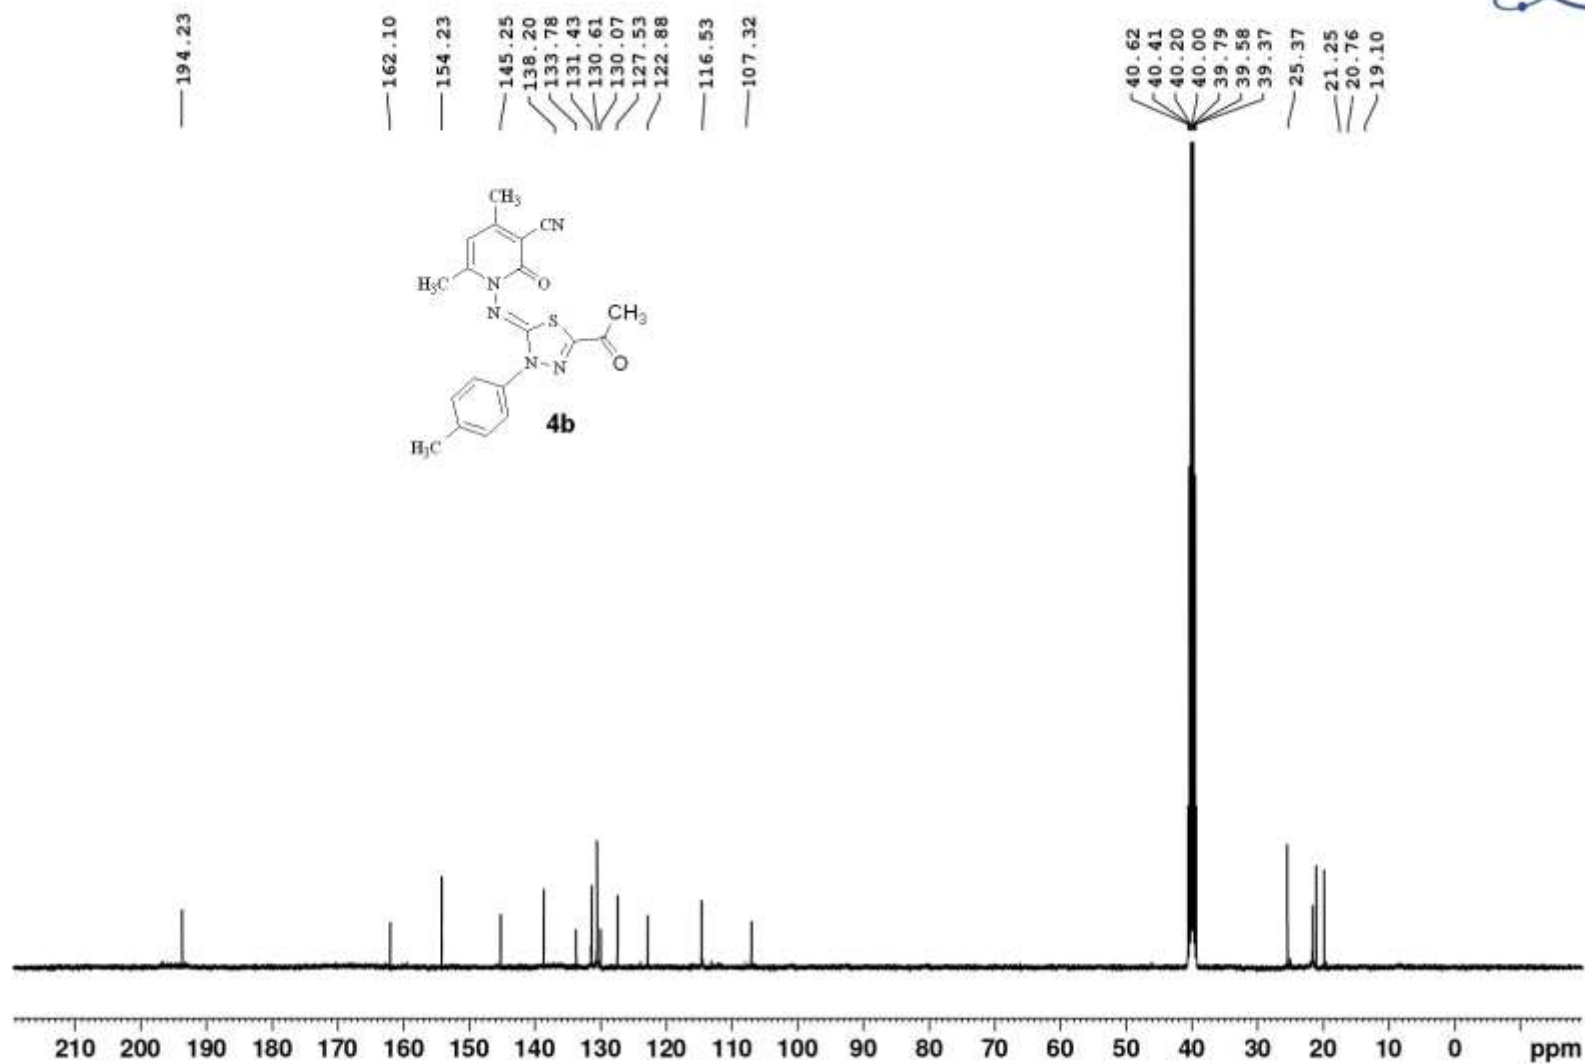

<sup>13</sup>C-NMR of compound **4b**

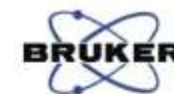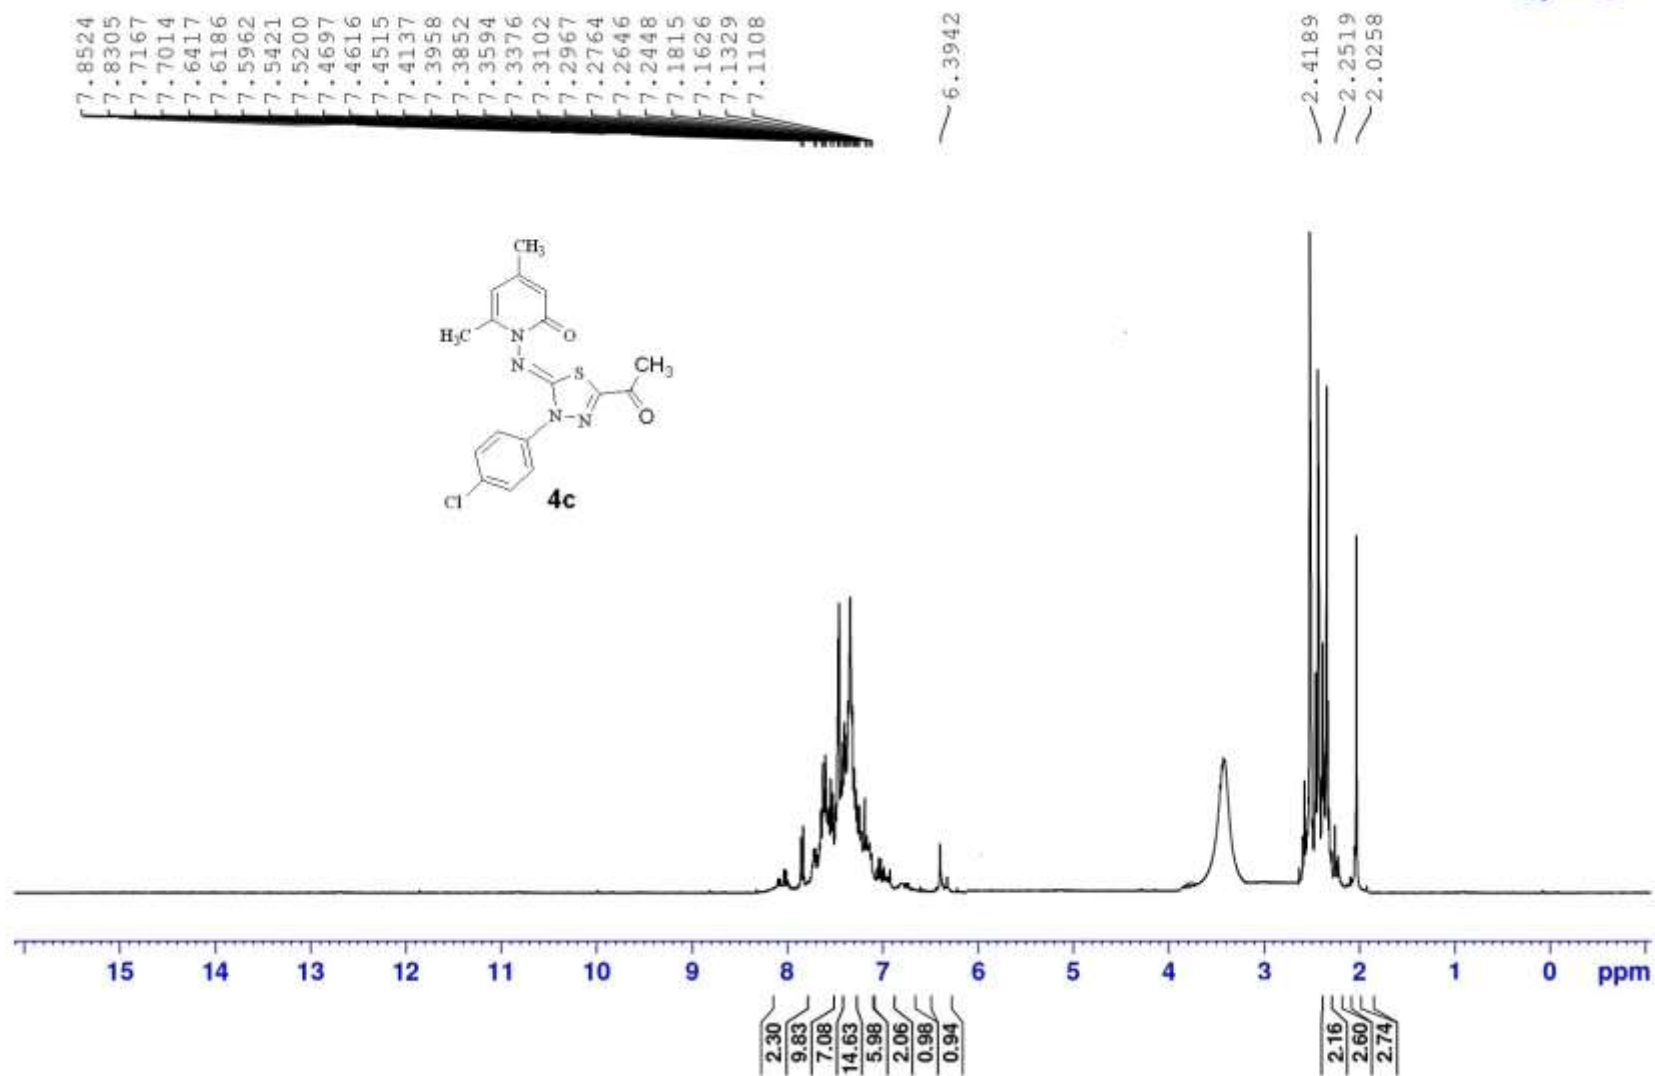

<sup>1</sup>H-NMR of compound **4c**

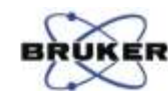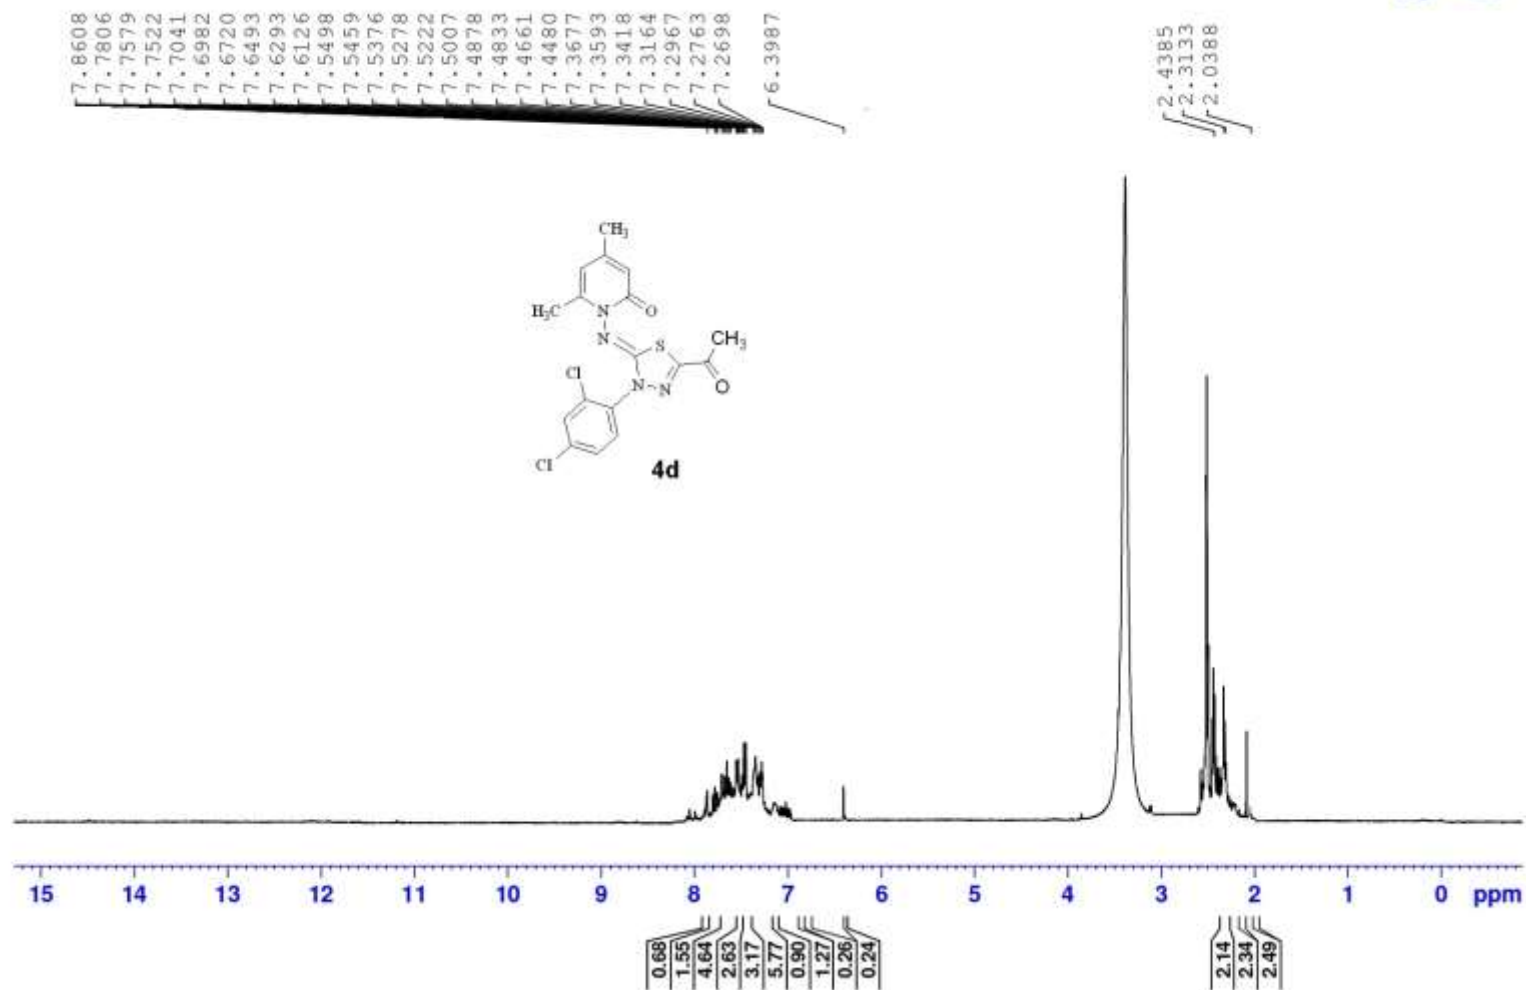

<sup>1</sup>H-NMR of compound **4d**

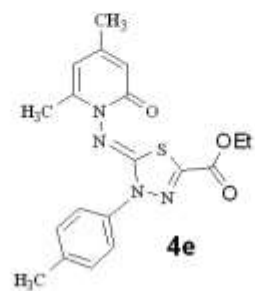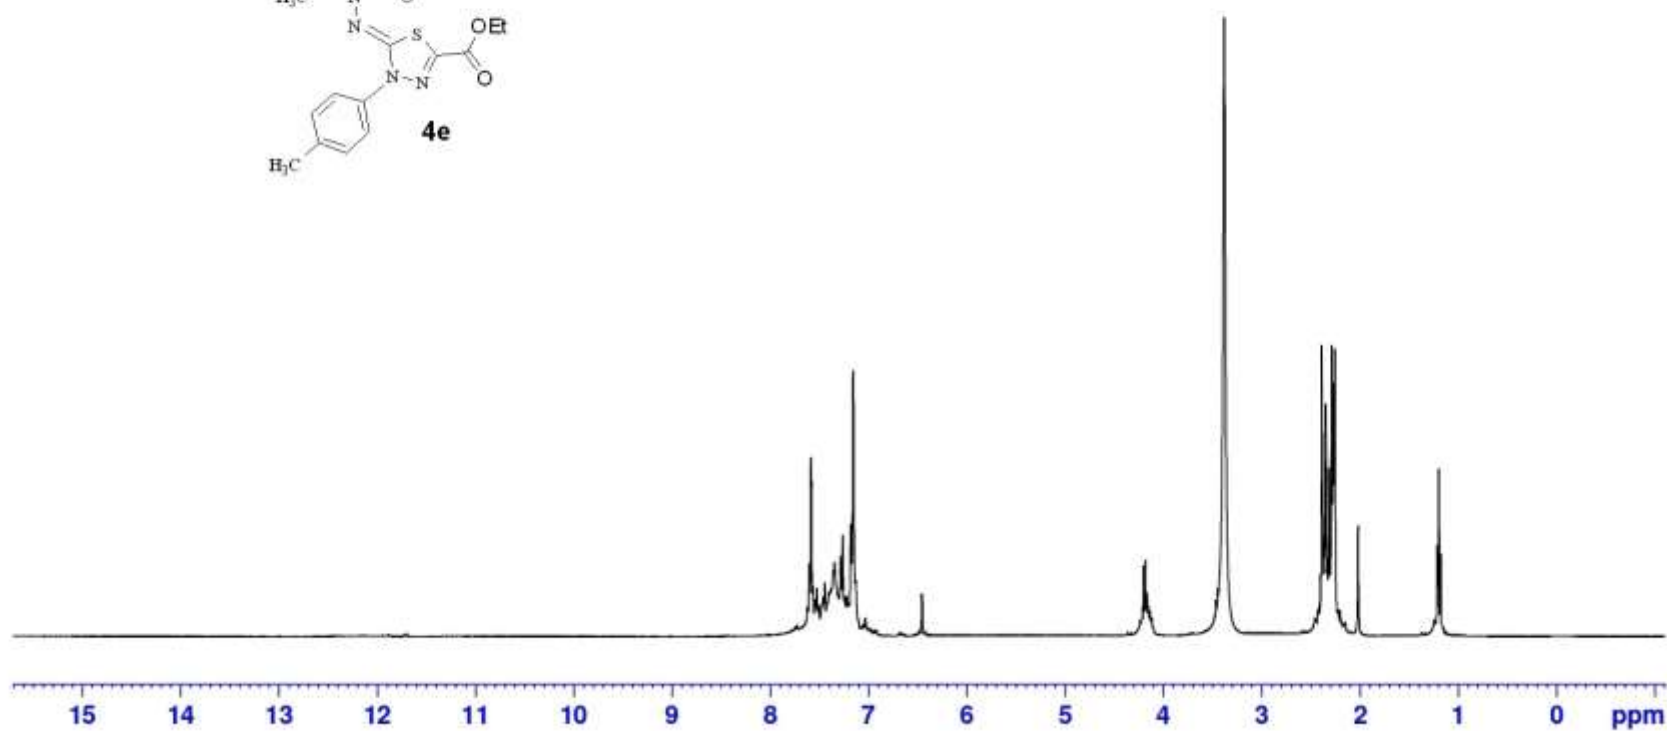

<sup>1</sup>H-NMR of compound **4e**

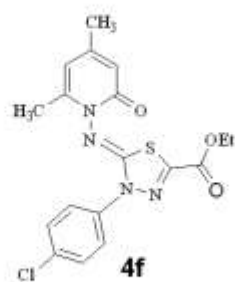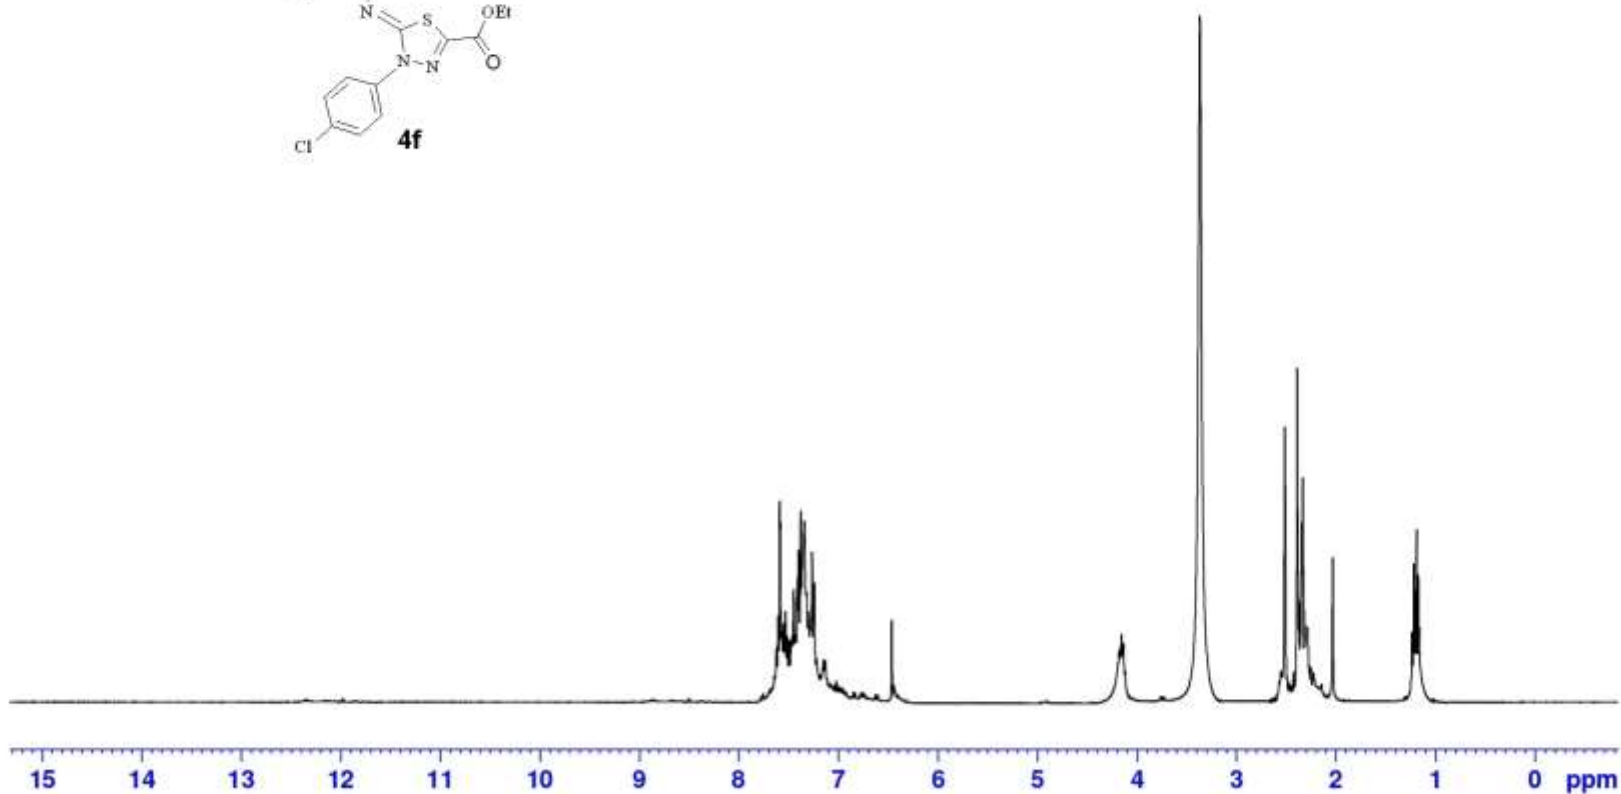

<sup>1</sup>H-NMR of compound **4f**

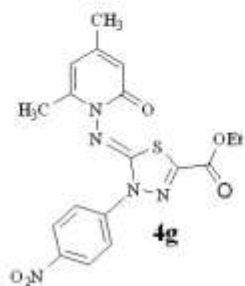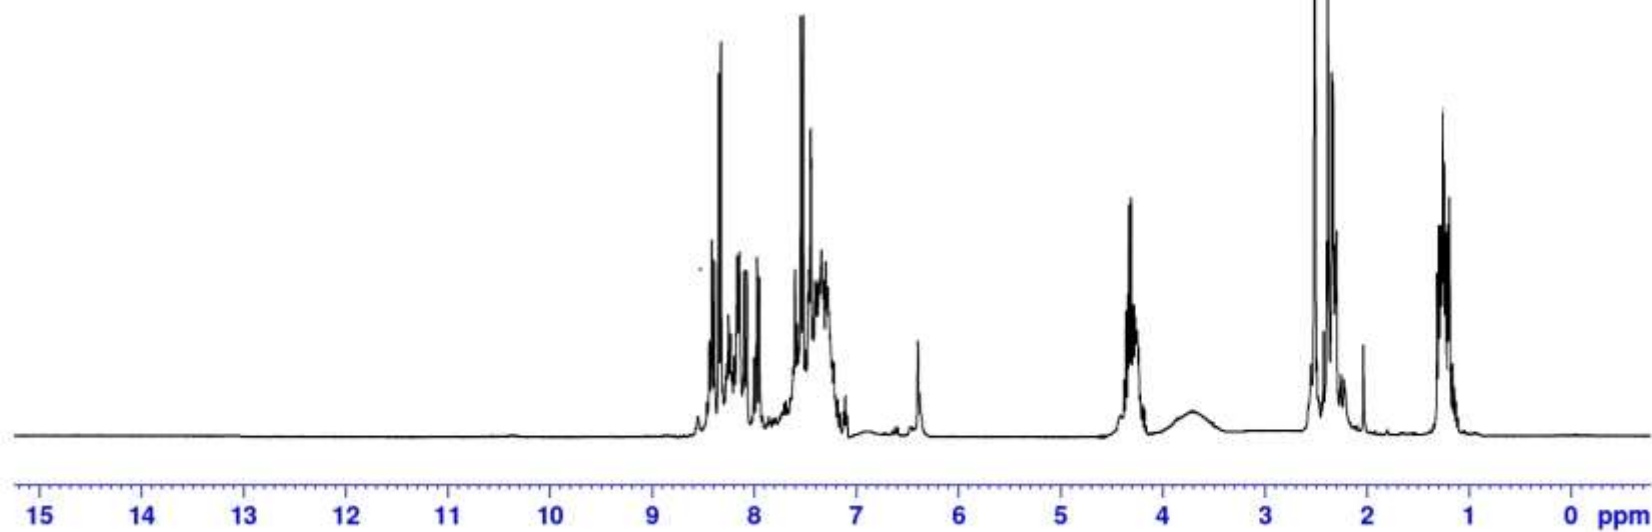

<sup>1</sup>H-NMR of compound **4g**

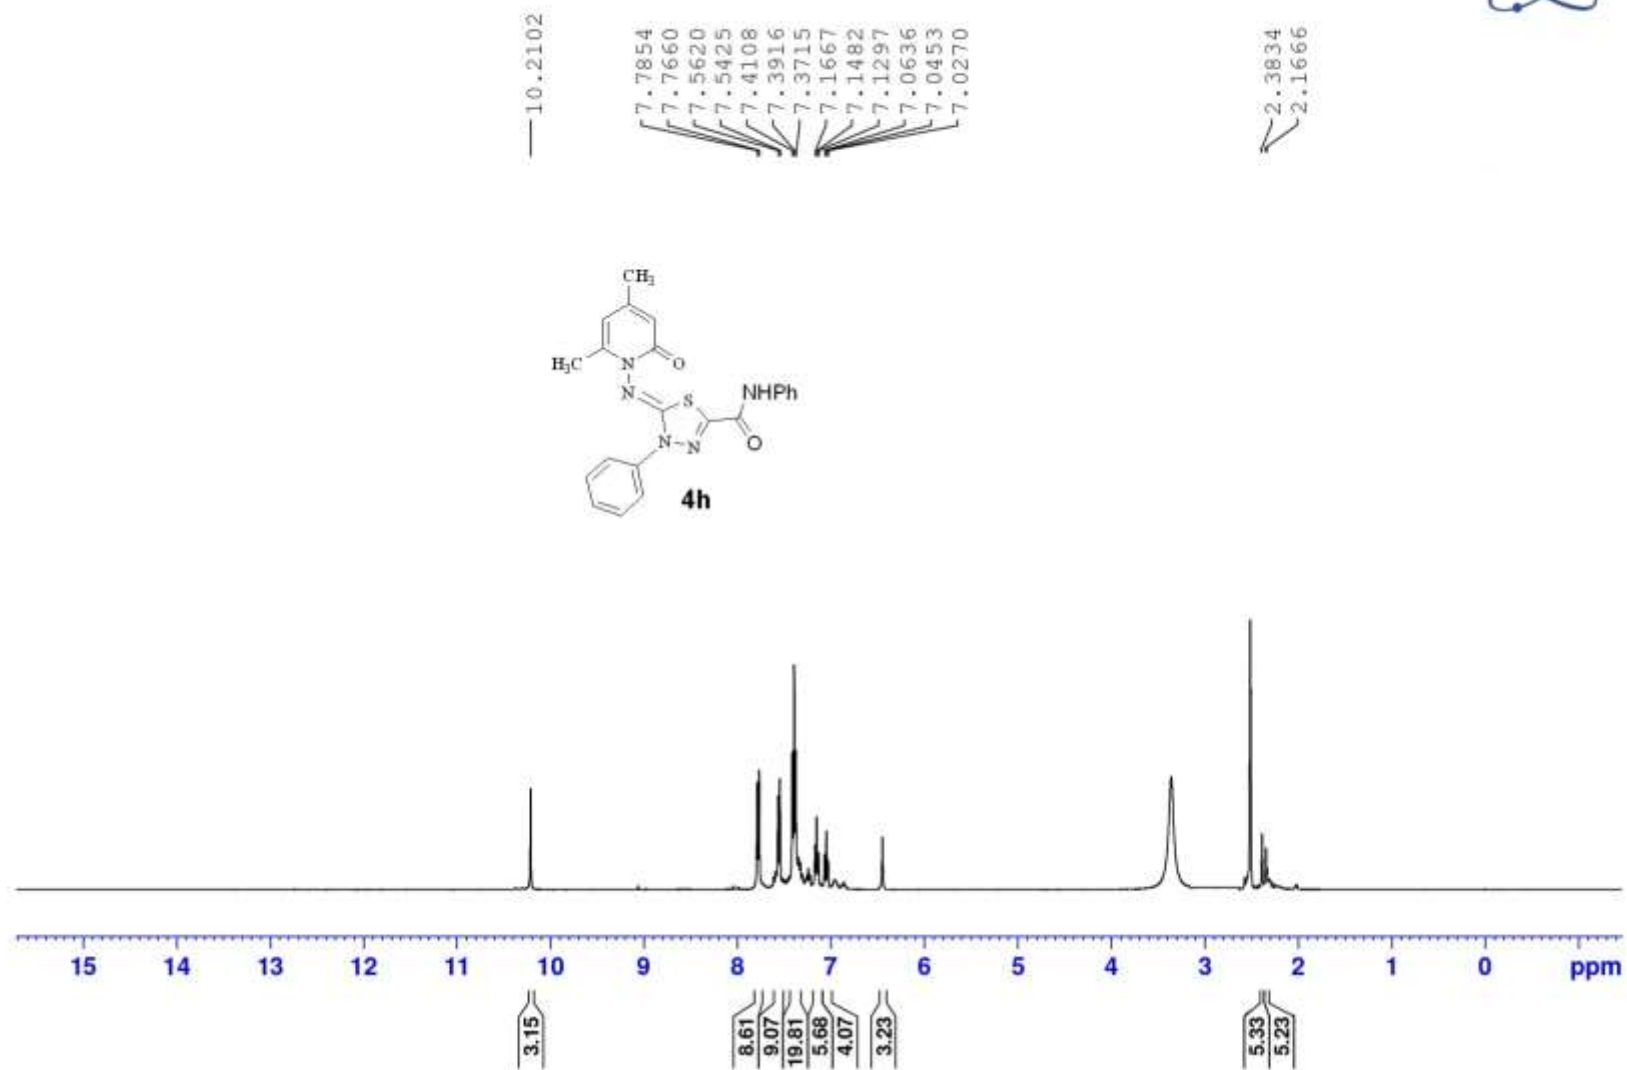

<sup>1</sup>H-NMR of compound **4h**

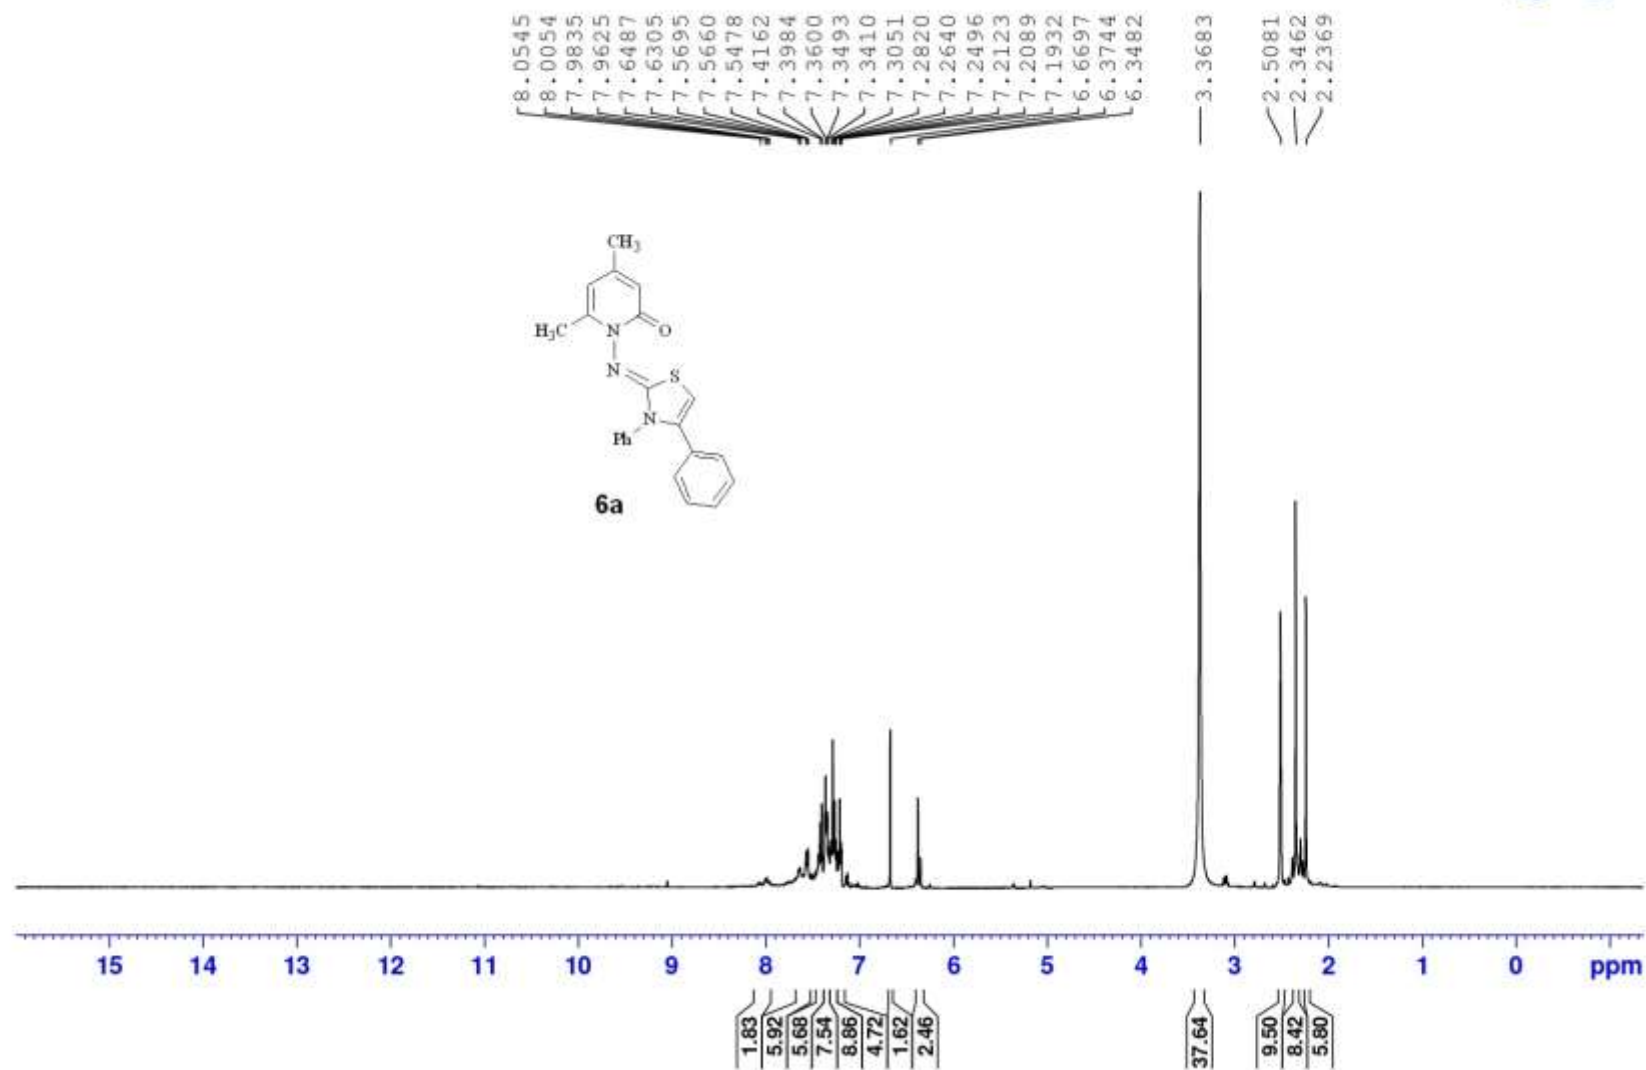

$^1\text{H-NMR}$  of compound **6a**

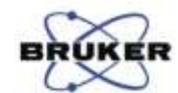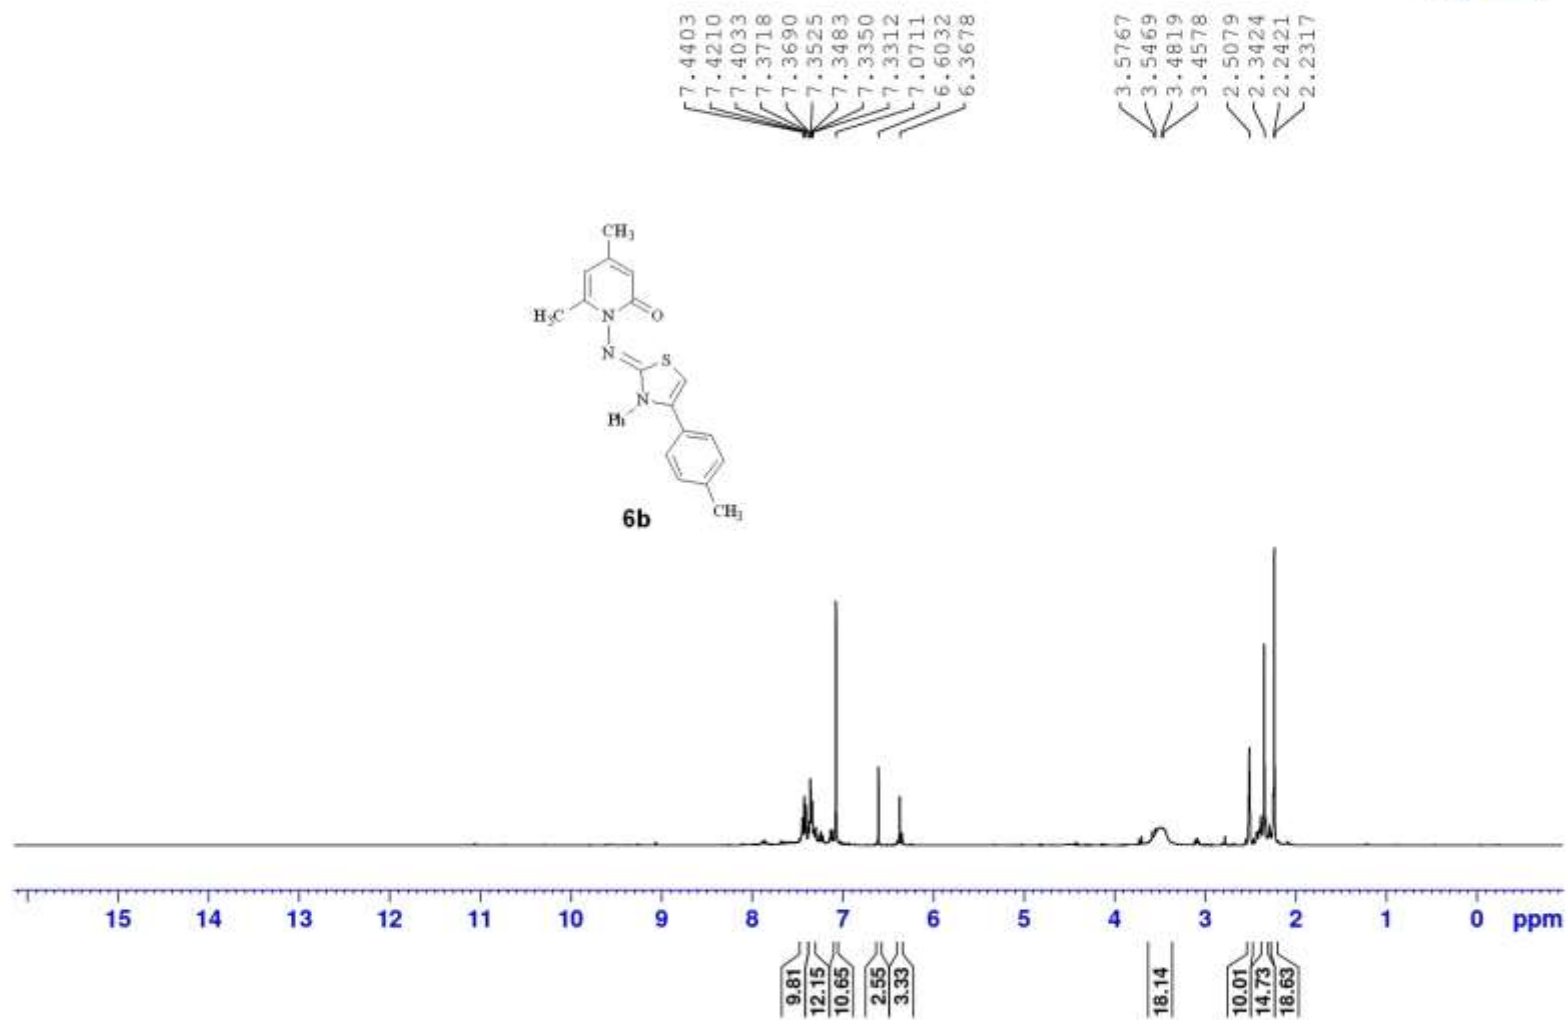

<sup>1</sup>H-NMR of compound **6b**

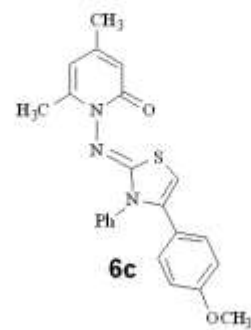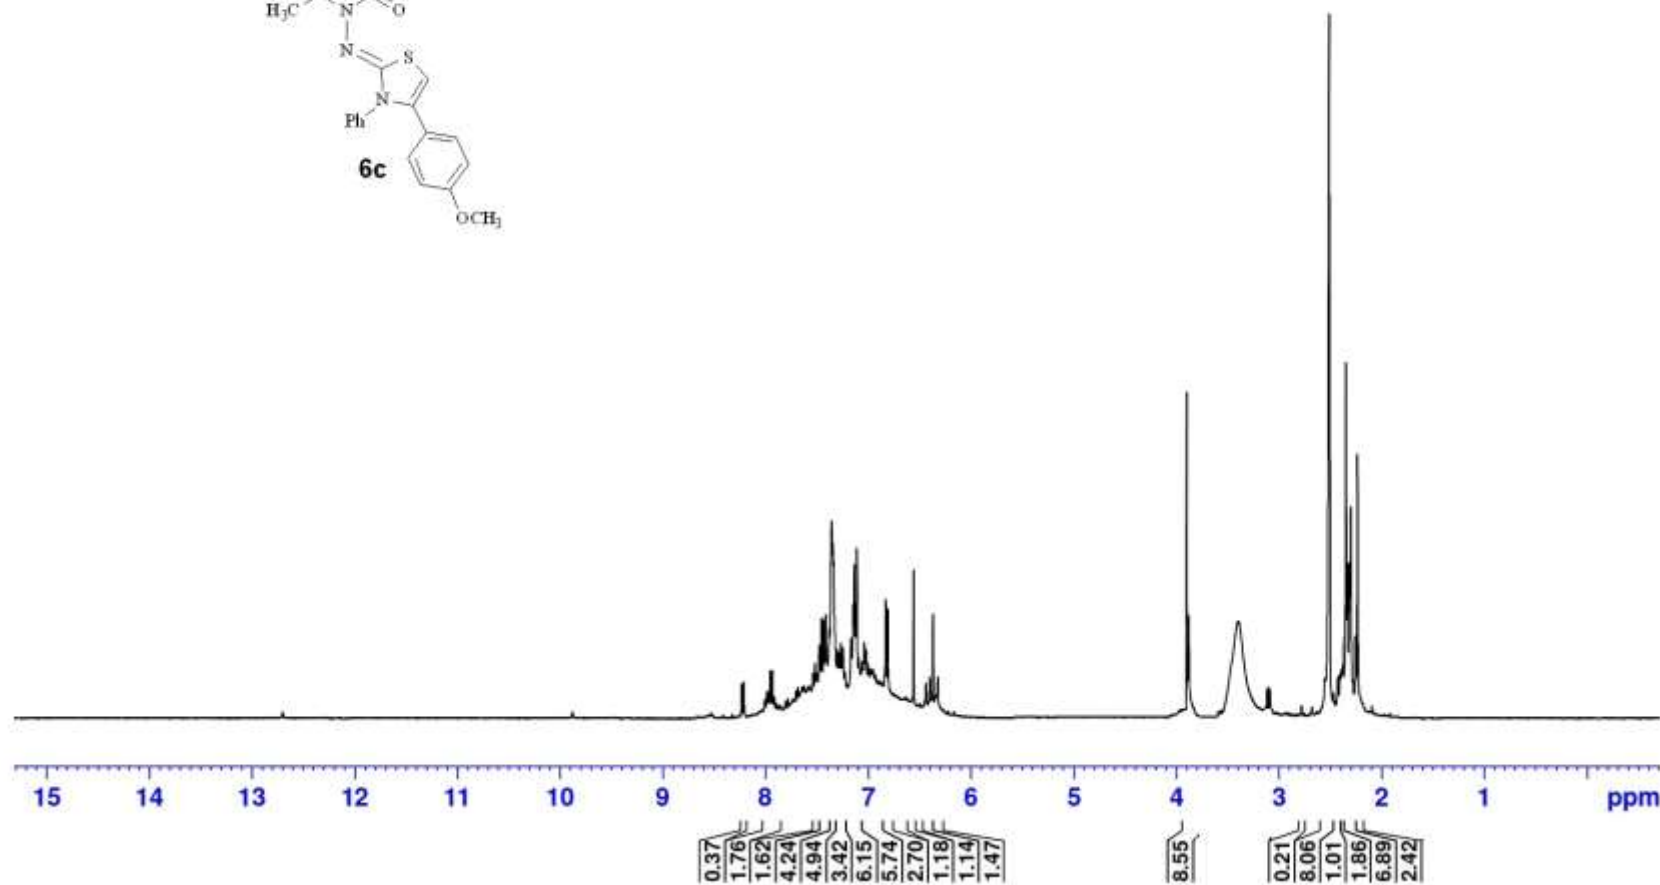

<sup>1</sup>H-NMR of compound **6c**

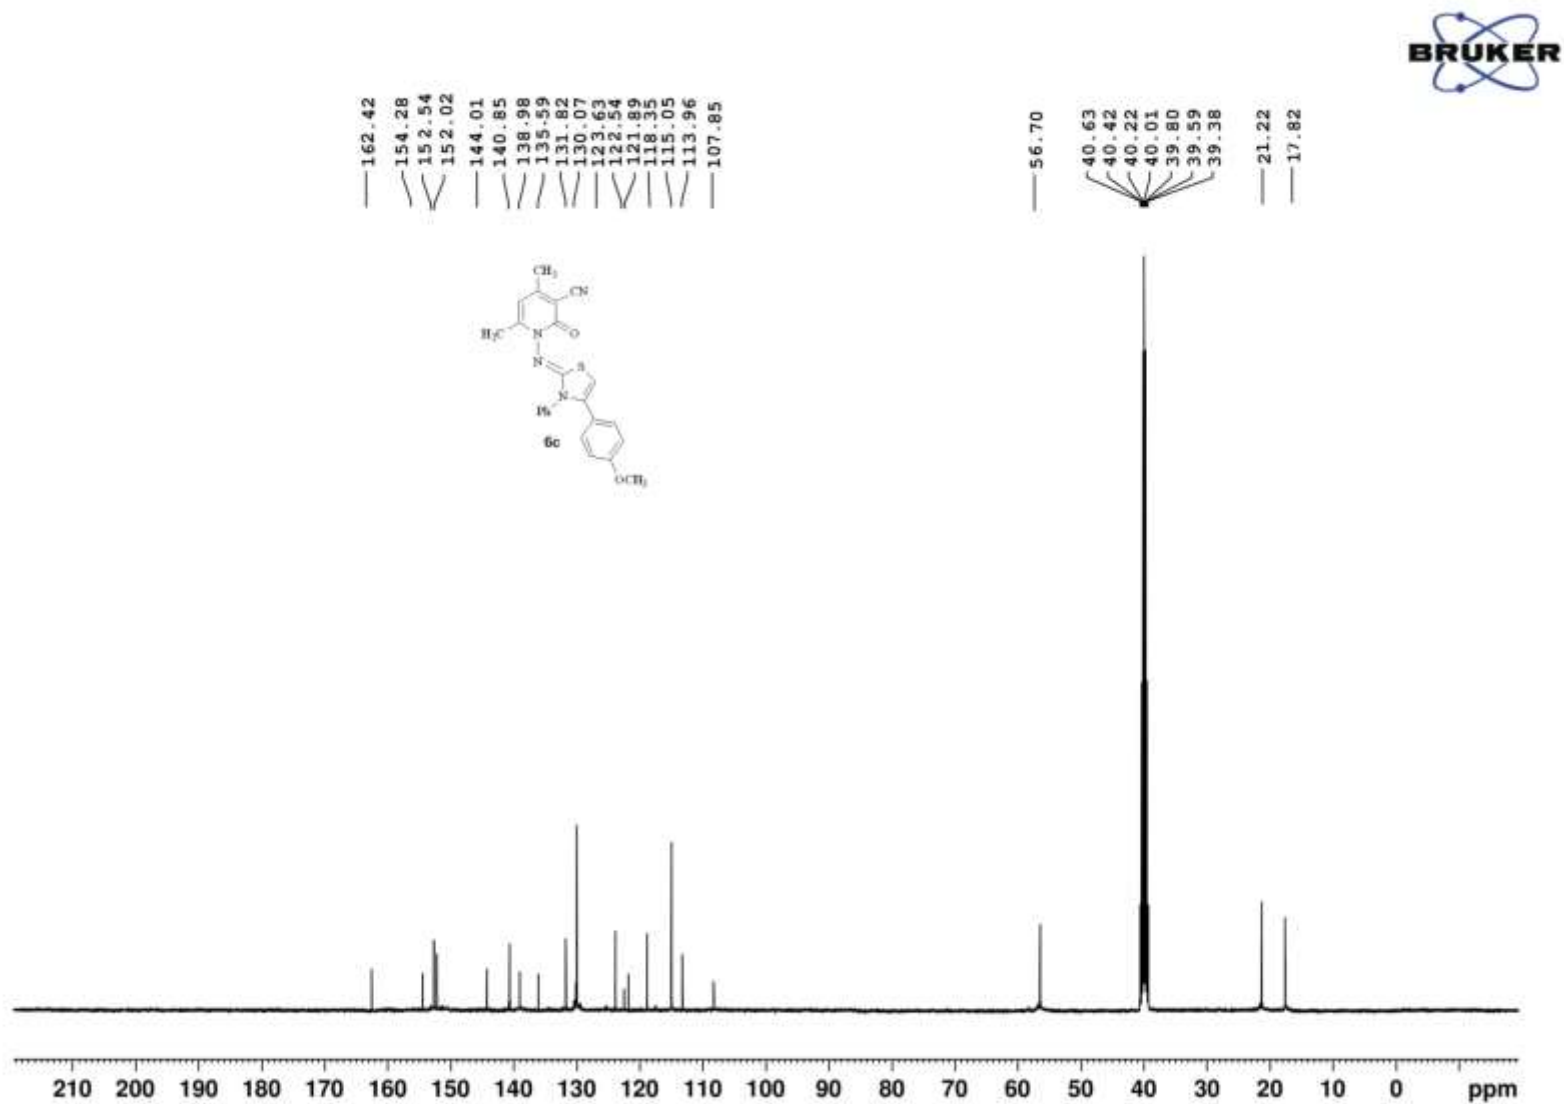

<sup>13</sup>C-NMR of compound **6c**

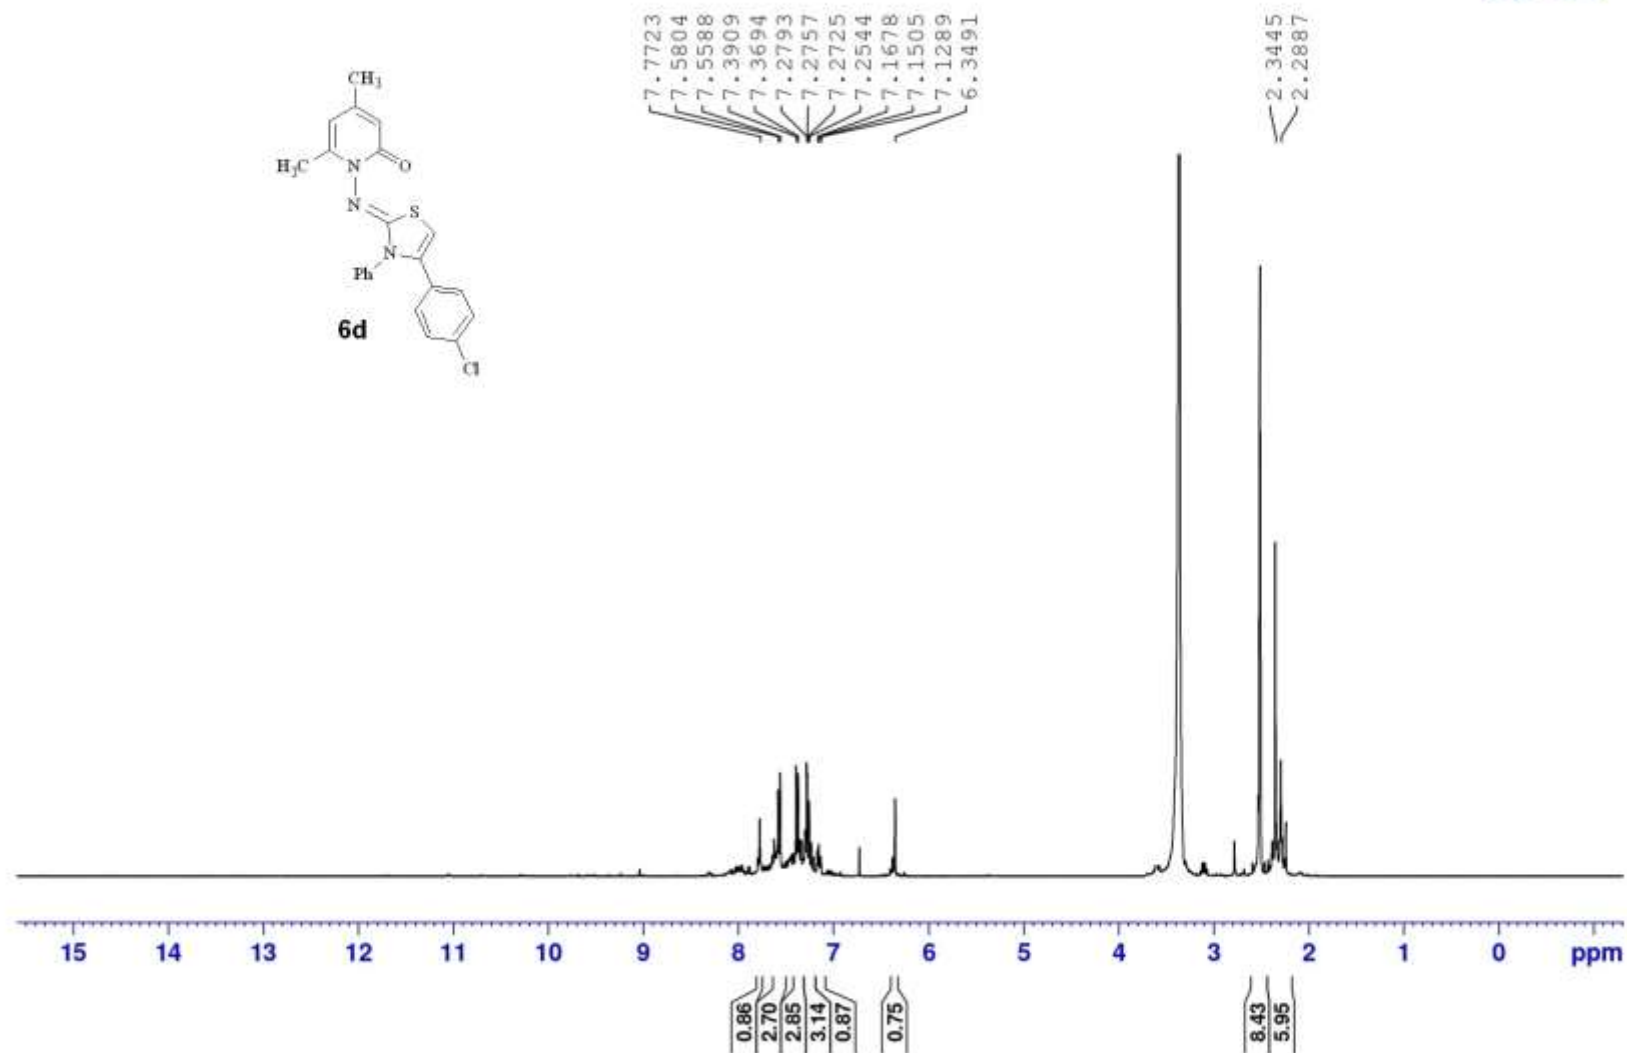

<sup>1</sup>H-NMR of compound **6d**

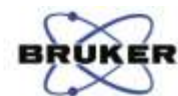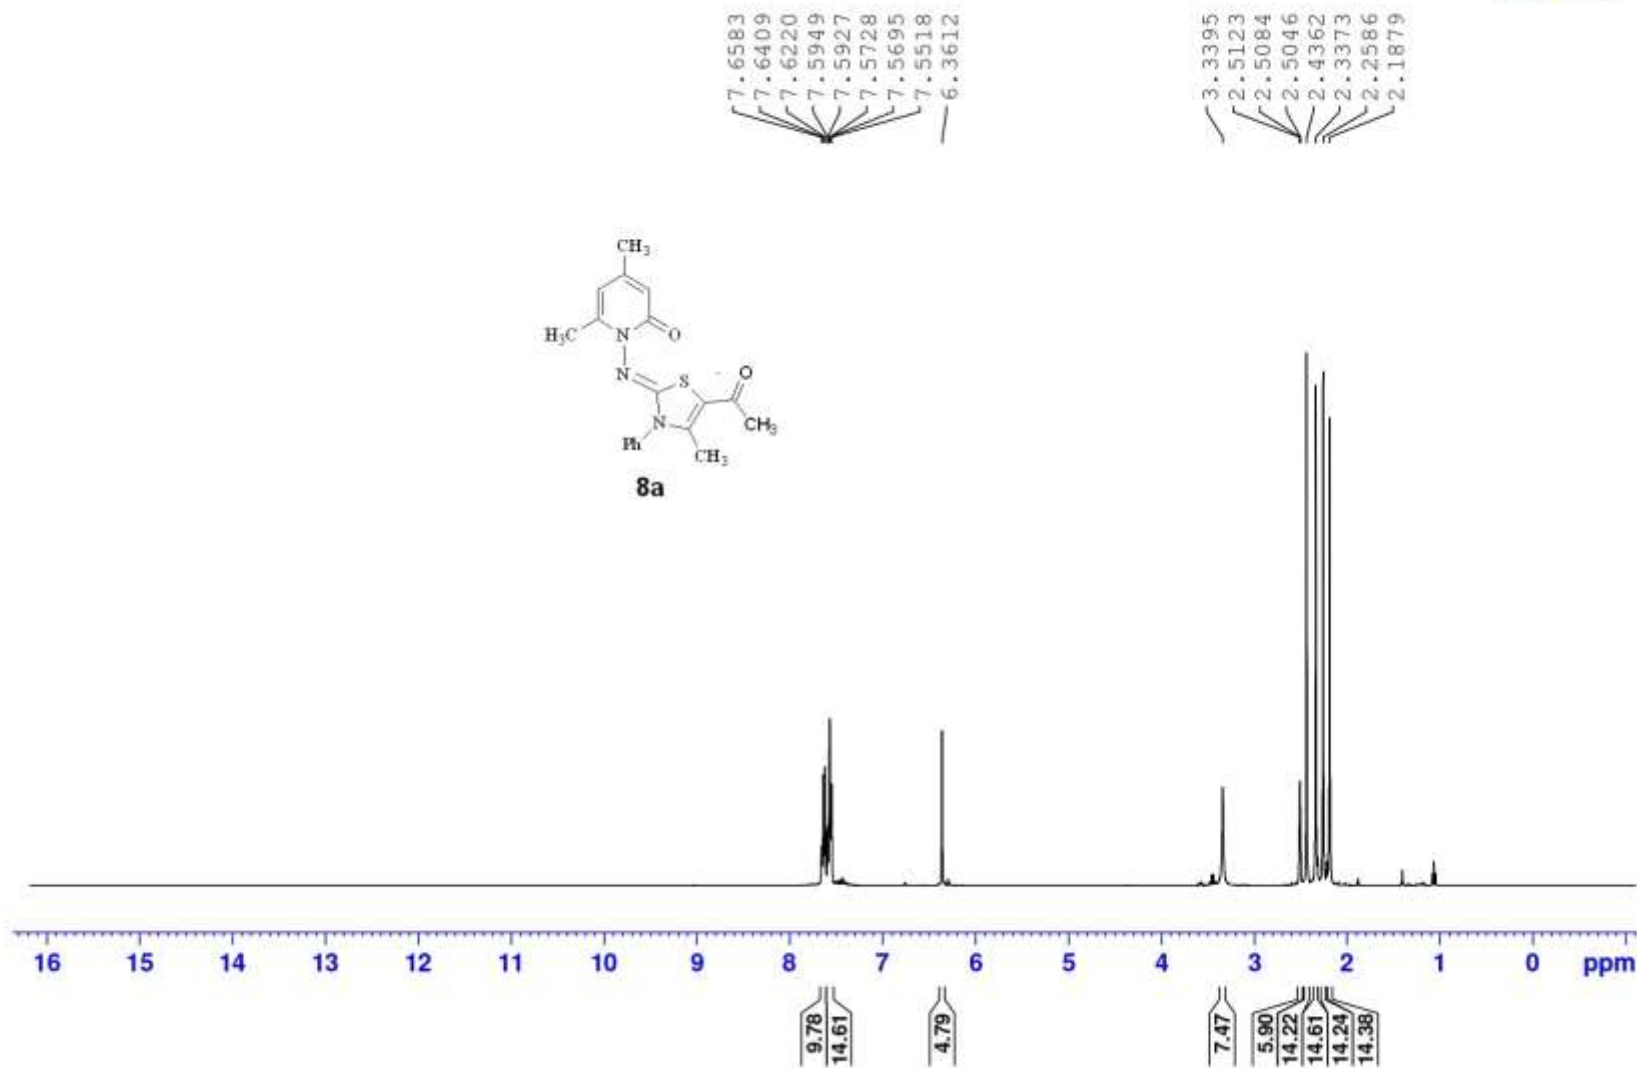

<sup>1</sup>H-NMR of compound **8a**

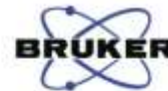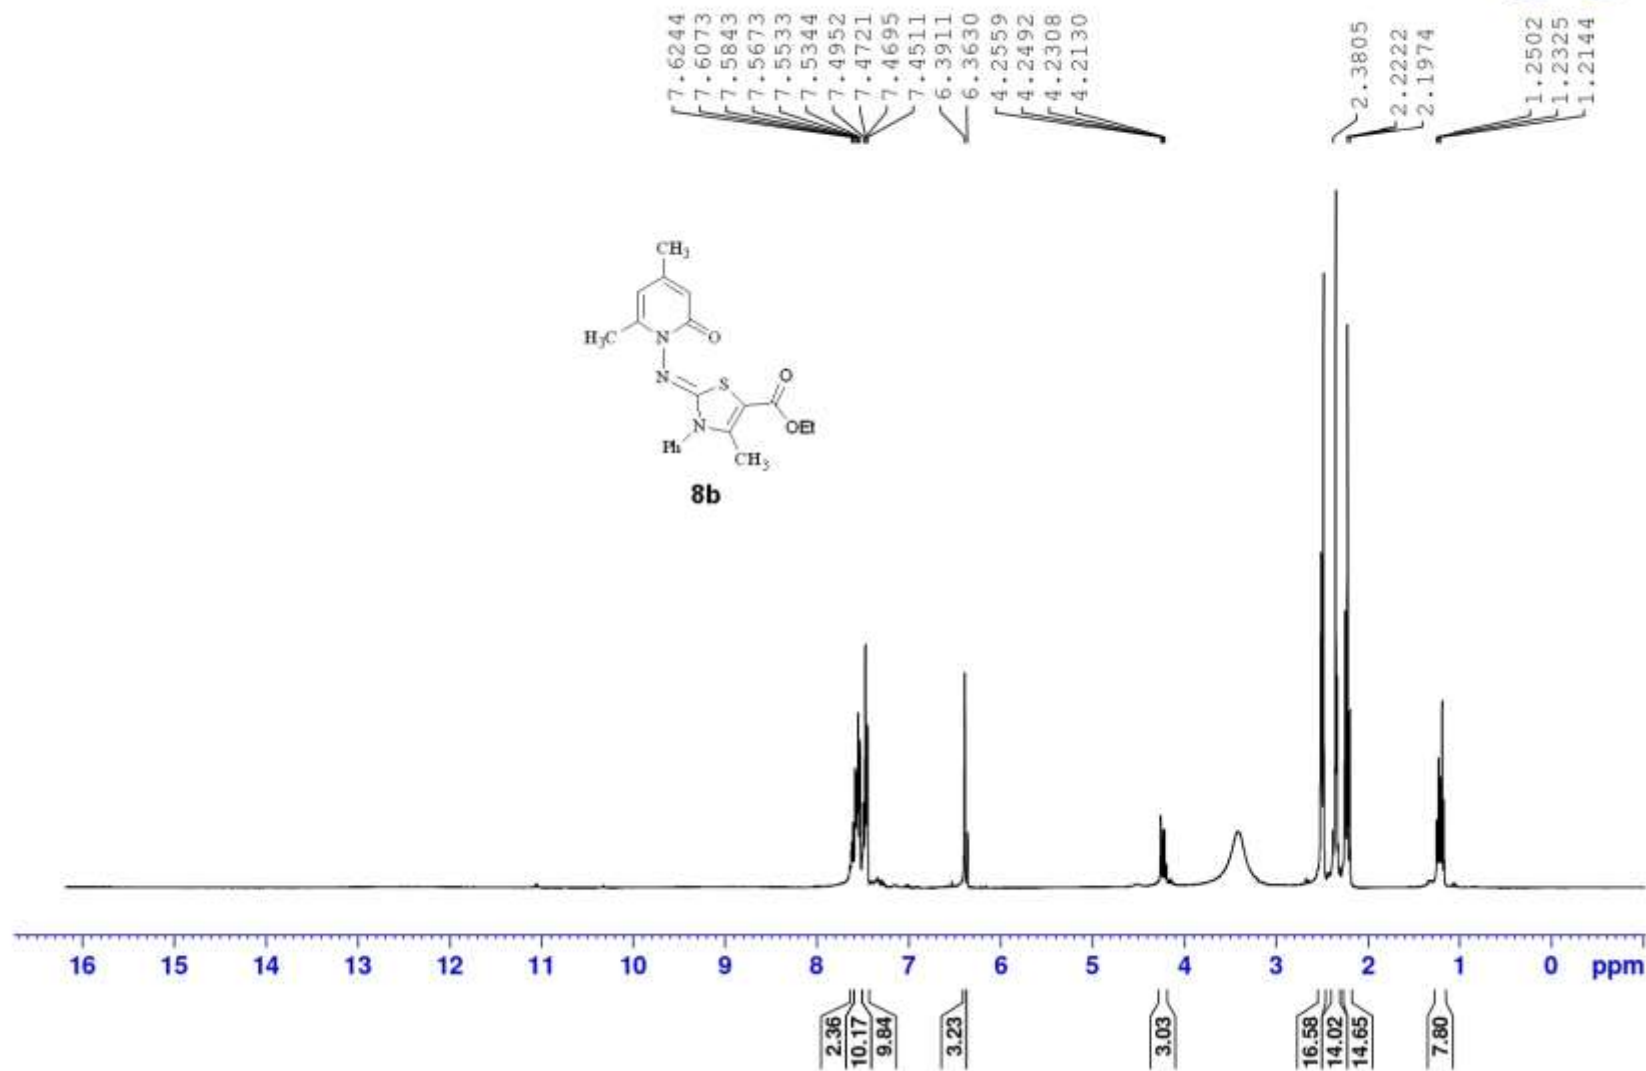

$^1\text{H-NMR}$  of compound **8b**

Al-Azhar University  
The Regional Center for Mycology & Biotechnology

**Evaluation of cytotoxicity against HCT-116 cell line**

**Requester Data:**

Name:  
Authority: Faculty of Science, Cairo University  
Sample Code: **4h**

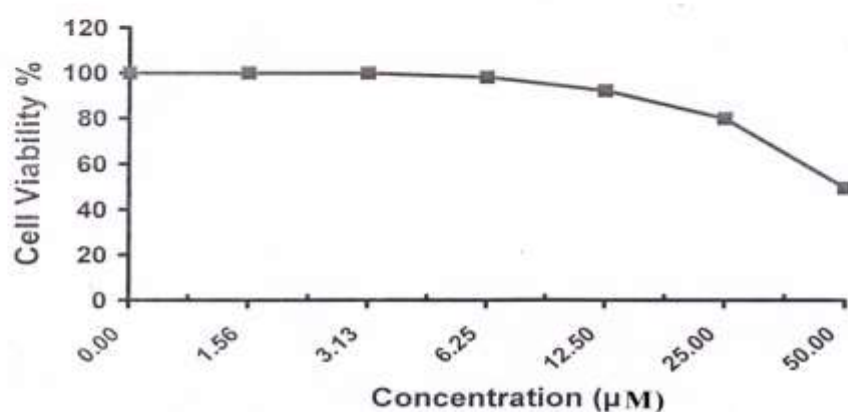

| Sample conc. | Viability % |
|--------------|-------------|
| 50           | 49.62       |
| 25           | 80.14       |
| 12.5         | 92.39       |
| 6.25         | 98.26       |
| 3.125        | 100         |
| 1.56         | 100         |
| 0            | 100.00      |

**Comment:**

*Inhibitory activity against colon carcinoma cells was detected under these experimental conditions with  $IC_{50} = 2.03 \mu M$*

**Investigator (s)****Director**

Al-Azhar University  
The Regional Center for Mycology & Biotechnology

**Evaluation of cytotoxicity against HepG-2 cell line**

**Requester Data:**

Name:

Authority: Faculty of Science, Cairo University

Sample Code: **4h**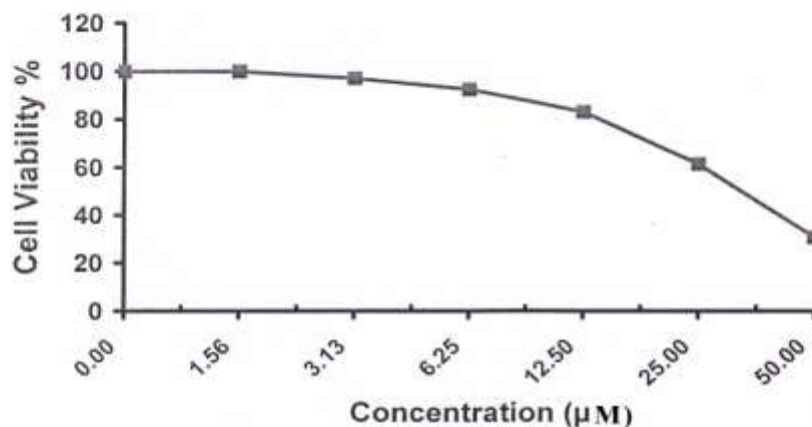

| Sample conc. | Viability % |
|--------------|-------------|
| 50           | 30.84       |
| 25           | 61.43       |
| 12.5         | 83.12       |
| 6.25         | 92.44       |
| 3.125        | 97.13       |
| 1.56         | 100.00      |
| 0            | 100         |

**Comment:**

*Inhibitory activity against hepatocellular carcinoma cells was detected under these experimental conditions with  $IC_{50} = 2.17 \mu M$*

**Investigator (s)****Director**
